# Supplementary material
Source: Royal Society of Chemistry journal article supplement (doi:10.1039/d6nr00725b)
Supplement: d6nr00725b1.pdf [file d6nr00725b1.pdf]

*Supporting Information*

**Organic-inorganic hybrid p-n junction composite for high-performance carbon monoxide gas sensing and mechanistic understanding using *in situ* Raman spectroscopy**

Karthigeyan P. S.<sup>a,b</sup>, Sasi Karan R. R.<sup>a,b</sup>, Hariramakrishnan S.<sup>a,b</sup>, Adityan S.<sup>a,b</sup>, Tamilarasan P.<sup>a,b,\*</sup>

<sup>a</sup>Electrodics and Electrocatalysis Division (EEC), CSIR-Central Electrochemical Research Institute (CECRI), Karaikudi 630003. Tamil Nadu. India.

<sup>b</sup>Academy of Scientific and Innovative Research (AcSIR), Ghaziabad 201 002, India.

\*Corresponding author email: [tamilan.cecri@csir.res.in](mailto:tamilan.cecri@csir.res.in)

**Table of Contents**

**ESI 1.** Materials and Instrumentation.

**ESI 2.** Conductivity comparison via I-V characterisation.

**ESI 3.** Raman spectrum of WNPP composite.

**ESI 4.** Calculation of d-spacing from XRD peaks.

**ESI 5.** HRTEM of exfoliated WS<sub>2</sub> NSs and composite.

**ESI 6.** Comparative surface elemental analysis of WS<sub>2</sub> NSs and WNPP.

**ESI 7.** Effect of WNPP composite ratio on CO sensing.

**ESI 8.** Carrier gas influence on 25 ppm CO detection.

**ESI 9.** Earlier reports.

## **ESI 1. Materials and Instrumentation**

### ***1.1 Materials***

Tungsten disulfide ( $\text{WS}_2$ ) and Dimethylformamide (DMF) were purchased from Sigma Aldrich. Poly(3,4-ethylenedioxythiophene)-polystyrenesulfonate (PEDOT:PSS) (1.25 wt%) was obtained from Polysciences. Glass slides (26x76 mm, thickness 1-1.2 mm) were procured from Lab Tech Micro Pvt. Limited. These materials were used without further purification. Unless otherwise mentioned, deionised water (resistivity: 18.2  $\text{M}\Omega\text{-cm}$ ) was used for all experiments.

### ***1.2 Apparatus and equipment***

The bulk  $\text{WS}_2$  was mechanically exfoliated using a Sonics VX-500 probe sonicator (~20 kHz frequency) with 500 W maximum power. The Raman spectra of the samples were acquired using a Renishaw Invia Spectrometer with a 785 nm laser. The crystallographic structure was confirmed through Grazing Incidence X-ray Diffraction (GIXRD) using a Rigaku SmartLab guidance (the power of 200mA, 45 kV) X-ray diffractometer for thin-film analysis obtained in the  $2\theta$  range from  $5^\circ$  to  $90^\circ$  and at  $3^\circ$  per min, using copper  $\text{K}\alpha$  radiation ( $\lambda = 1.54 \text{ \AA}$ ). X-ray Photoelectron Spectroscopy (XPS) was deployed to analyse chemical composition and oxidation states using a Thermo Scientific ESCALAB 250 Xi spectrometer. High-Resolution Transmission Electron Microscopy (HRTEM) using FEI TalosF200S was used for surface morphology imaging, while Energy Dispersive X-ray Analysis (EDX) was used for elemental composition analysis, utilising the Talos EDX FEI, Netherlands (model: Super S) system. Carl Zeiss SUPRA 55VP was used for the FESEM (Field Emission Scanning Electron Microscope) images. The T-shaped Au/Ti (100 nm/5 nm) electrodes with a 30  $\mu\text{m}$  channel width were deposited through a stencil using Hydro Pneo Vac Technologies (India) electron beam evaporation system inside an ISO 7 cleanroom. The gas sensing analyses were done using a controlled gas sensing chamber (Hydro Pneo Vac Technologies, India) where the ohmic electrical contacts were established by precision micropositioners with gold-coated tungsten probes (tip diameter: 20  $\mu\text{m}$ ). The gas supply was controlled using Alicat multi-gas mass flow controllers. The change in current (and thus resistance) under applied bias was monitored using a Keithley 2612B sourcemeter.

## ESI 2. Conductivity comparison via I-V characterization

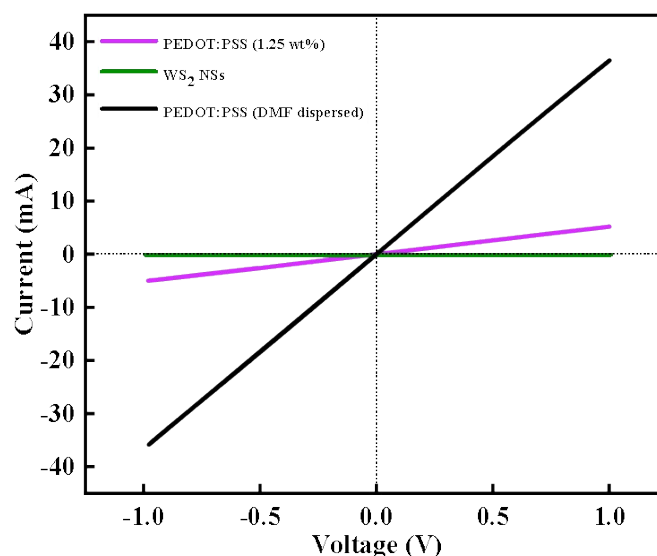

**Figure S1.** Comparative I-V characteristics of devices with WS<sub>2</sub> NSs and PEDOT:PSS channel.

In **Figure S1** conductivity comparison among WS<sub>2</sub> NSs, bare PEDOT:PSS (1.25 wt% in aqueous medium), and DMF-dispersed PEDOT:PSS reveals a clear trend. WS<sub>2</sub> NSs, being intrinsic semiconductors, exhibit relatively low conductivity. In contrast, aqueous-dispersed PEDOT:PSS demonstrated moderate conductivity due to its polymeric nature. However, when PEDOT:PSS is dispersed in a polar organic solvent DMF, a significant enhancement in conductivity is observed. This improvement is attributed to the disruption of Coulomb interactions between PEDOT<sup>+</sup> and PSS<sup>-</sup> chains, leading to a more conductive and better-organised PEDOT<sup>+</sup> polymer network. As reported earlier, the addition of polar organic solvents such as DMF improves the film uniformity and electrical conductivity of PEDOT:PSS by weakening Coulomb interactions between PEDOT<sup>+</sup> and PSS<sup>-</sup>, promoting better phase separation and charge transport. Moreover, the structural transition from the benzoid to the more conductive quinoid form in PEDOT enhances  $\pi$ -conjugation and chain linearity, resulting in an enhancement of electrical properties.

## ESI 3. Raman spectrum of WNPP composite

The exfoliated WS<sub>2</sub> NSs perfectly embedded into the polymer matrix are confirmed by using Raman spectroscopy to take spectra from the different regions. For the PEDOT:PSS Oxyethylene ring deformation occurs at 439 cm<sup>-1</sup>, 525 cm<sup>-1</sup>, and 947 cm<sup>-1</sup>, indicating

structural stability. The  $578\text{ cm}^{-1}$  mode corresponds to  $C_{\alpha}-C_{\alpha}-C_{\beta}$  bending vibrations coupled with ethylenedioxy ring contributions, while the  $701\text{ cm}^{-1}$  band is attributed to symmetric C–C–C bending influenced by ethylenedioxy ring vibrations. The  $991\text{ cm}^{-1}$  mode represents ethylenedioxy ring bending along with  $C_{\alpha}-C_{\alpha}-C_{\beta}$  deformation, and the  $1099\text{ cm}^{-1}$  peak corresponds to in-plane C–H bending. Further, the  $1149\text{ cm}^{-1}$  band is associated with C–O–C deformation, while  $1220\text{ cm}^{-1}$  corresponds to inter-ring C–C stretching combined with C–H bending. The  $1258\text{ cm}^{-1}$  peak signifies  $C_{\alpha}-C_{\alpha}$  stretching, whereas  $1371\text{ cm}^{-1}$  represents a combination of  $C_{\beta}-C_{\beta}$  and  $C_{\alpha}-C_{\alpha}$  stretching vibrations. The symmetric stretching of  $C_{\alpha}-C_{\beta}$  bonds occurs at  $1424\text{ cm}^{-1}$  in the reduced state, while asymmetric stretching is observed at  $1529\text{ cm}^{-1}$  in the oxidised state and at  $1552\text{ cm}^{-1}$  in the reduced state <sup>1,2</sup>.

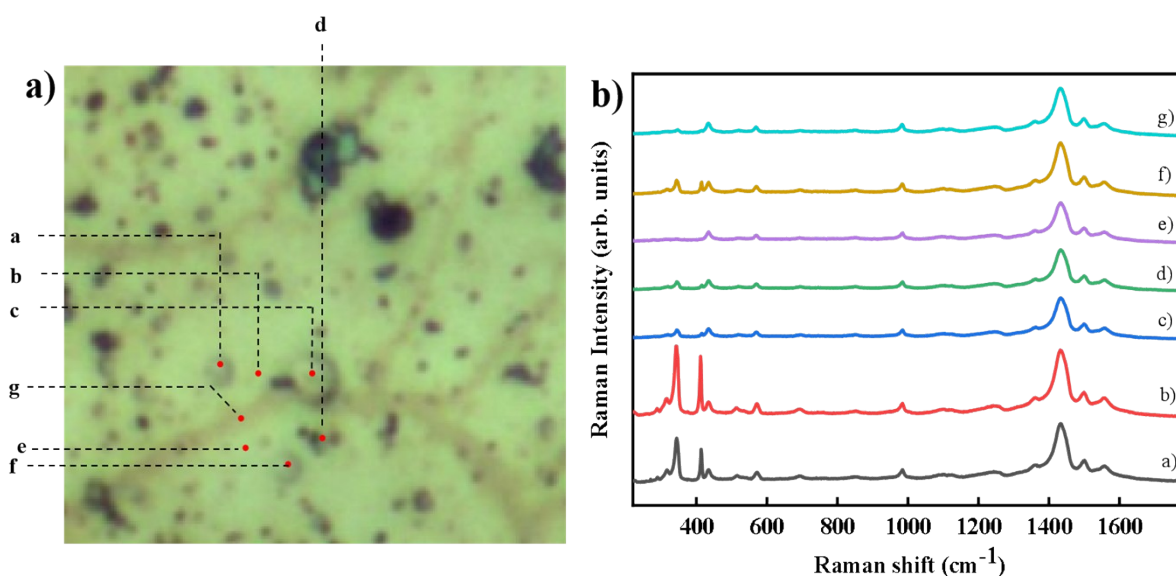

**Figure S2.** Raman spectrum of WNPP. **(a)** Optical image of the sample with marked spots and **(b)** Raman spectra at the marked spots.

#### ESI 4. Calculation of d-spacing from XRD peaks

Using Bragg's law:

$$d = \frac{\lambda}{2 \sin\theta}$$

Peak position,  $2\theta = 14.2^\circ$ . Thus,  $\theta = 7.1^\circ$

$$d = \frac{1.5406}{2 \times 0.2472} = \frac{1.5406}{0.2472} = 0.623\text{ nm or }6.23\text{ \AA}$$

The XRD peak at  $2\theta = 14.2^\circ$  corresponds to the (002) crystal plane of 2H-WS<sub>2</sub>. The calculated interlayer d-spacing from this peak is approximately 0.623 nm, which aligns well with typical values for the spacing between WS<sub>2</sub> layers in the hexagonal structure. This confirms the layered nature of the exfoliated WS<sub>2</sub> NS<sup>3</sup>.

Compared to bulk, exfoliated few-layer or monolayer WS<sub>2</sub> NSs offer more active sites with higher activity due to a higher surface-to-volume ratio. The transition from an indirect-to-direct band gap enhances the density of states near the Fermi level, improving charge transfer and boosting sensing sensitivity. Additionally, the presence of high-energy surface atoms enhances chemical reactivity and gas adsorption efficiency<sup>4,5</sup>.

### ESI 5. HRTEM of exfoliated WS<sub>2</sub> NSs and composite

From the SAED analysis, a value of 7.159 nm<sup>-1</sup> was obtained, which corresponds to the reciprocal of twice the radius (1/2r). To calculate the in-plane lattice spacing, this value was first divided by 2, yielding 3.5795 nm<sup>-1</sup>, which represents 1/d. Taking the inverse of this value, the lattice spacing was calculated as  $d=1/3.5795 = 0.2794$  nm. In **Figure S3 (a)**, clear lattice fringes from the exfoliated WS<sub>2</sub> NSs are observed, exhibiting an in-plane lattice distance of 0.276 nm. In **Figure S3 (b)**, the exfoliated nanosheets embedded within the polymer matrix are clearly visible, confirming successful incorporation into the composite.

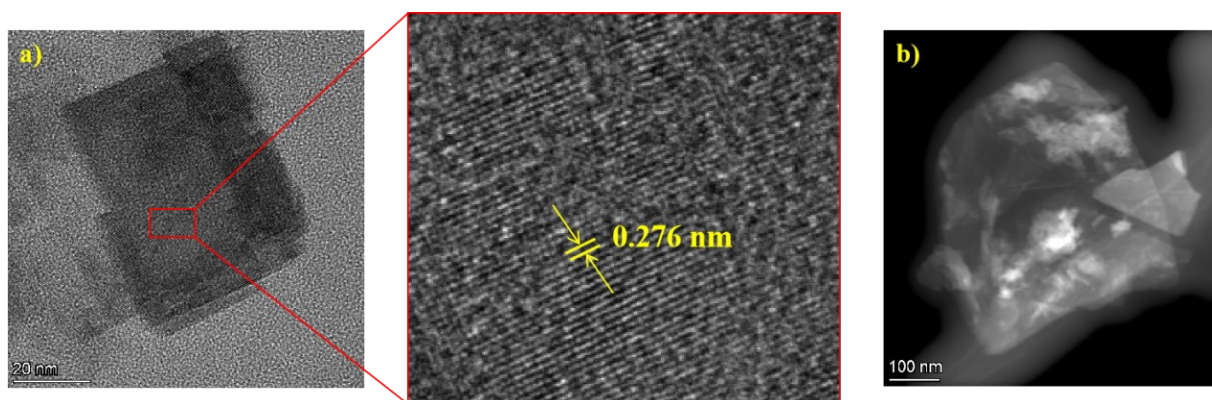

**Figure S3.** (a) HRTEM image of WS<sub>2</sub> NSs and (b) HAAEDF image of WNPP.

The energy dispersive X-ray spectrum for the WNP in **Figure S4** shows a high carbon content (72.2%), reflecting the carbon-rich PEDOT:PSS polymer uniformly distributed in the composite, Tungsten (7.3%), sulphur (18.7%), and oxygen (1.2%) due to PEDOT:PSS and also some from WO<sub>x</sub>.

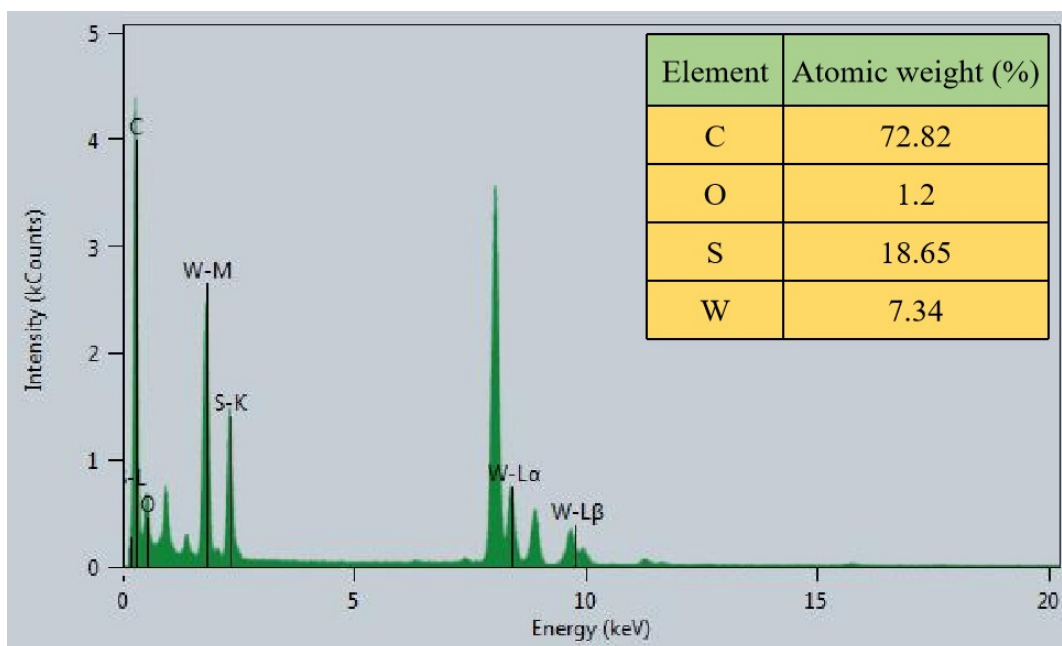

**Figure S4.** WNPP EDS spectrum.

### ESI 6. Comparative surface elemental analysis of WS<sub>2</sub> NSs and WNPP

The elemental composition of WS<sub>2</sub> NSs and WNPP was compared to assess changes in surface chemistry and purity after processing. In pristine exfoliated WS<sub>2</sub> NSs, Tungsten (W 4d) accounted for 14.08 At% and sulfur (S 2p) for 1.58 At%, respectively. Notably, the sample showed a dominant oxygen (O 1s) content of 83.29 At%, likely due to heavy surface oxidation or exposure to ambient air. The carbon (C 1s) content was minimal at 1.04 At%, indicating relatively low organic contamination in the pristine sample.

**Table S1.** WNPP Atomic percent from XPS.

| Element | WS <sub>2</sub> NSs Atomic % | (WNPP)Atomic % |
|---------|------------------------------|----------------|
| W 4d    | 14.08                        | 8.23           |
| S 2p    | 1.58                         | 11.58          |
| C 1s    | 1.04                         | 48.77          |
| O 1s    | 83.29                        | 31.41          |

In contrast, the WNPP sample exhibited a lower W 4d atomic percentage (8.23 At%) but a substantial increase in S 2p (11.58 At%), indicating improved sulphur retention. The significant reduction in oxygen content (48.77 At%) compared to the pristine sample, along with a marked increase in carbon (31.41 At%), suggests surface modification through organic functionalization of a carbon-rich PEDOT:PSS matrix.

#### ESI 7. Effect of WNPP composite ratio on CO sensing

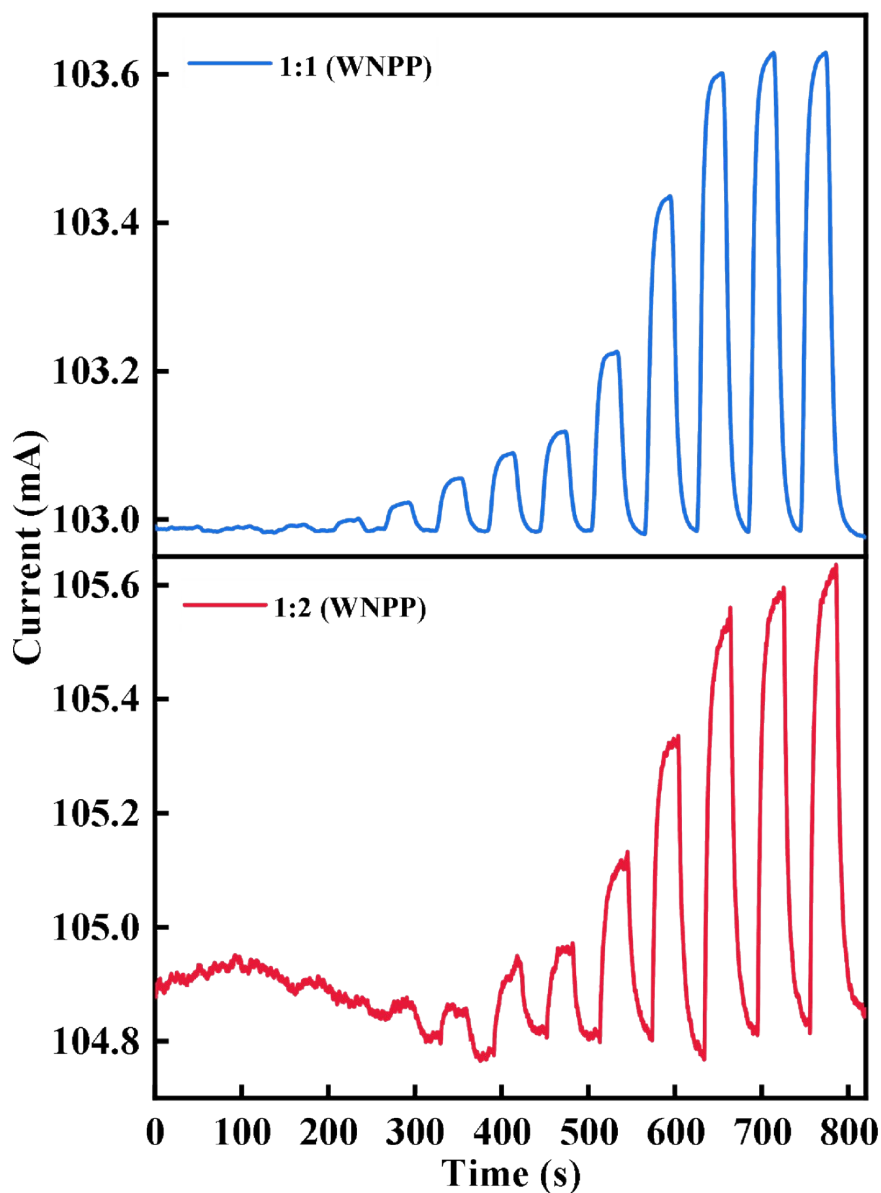

**Figure S5.** 1:1 (w/w) and 1:2 (w/w) of WNPP composites CO response (1 to 1000 ppm)

When comparing the 1:2 and 1:1 (w/w) composite, 1:1 exhibited the best performance, showing enhanced baseline stability and increased sensitivity, including detection of lower CO concentrations (Figure S5). This improvement arises from the optimal interaction between n-type WS<sub>2</sub> and p-type PEDOT:PSS, forming effective p-n heterojunctions that facilitate charge separation and boost charge transport during gas exposure.

### ESI 8. Carrier gas influence on 25 ppm CO detection

To confirm the sensing mechanism, CO responses were measured using air and nitrogen (N<sub>2</sub>) as carrier gases (Figure S7). Under N<sub>2</sub>, the device showed noisier signals and lower sensitivity due to the lack of oxygen needed for forming adsorbed oxygen species. However, CO still interacted directly with WS<sub>2</sub> active sites. Overall, sensing was less effective in N<sub>2</sub>, highlighting oxygen's key role in enhancing performance.

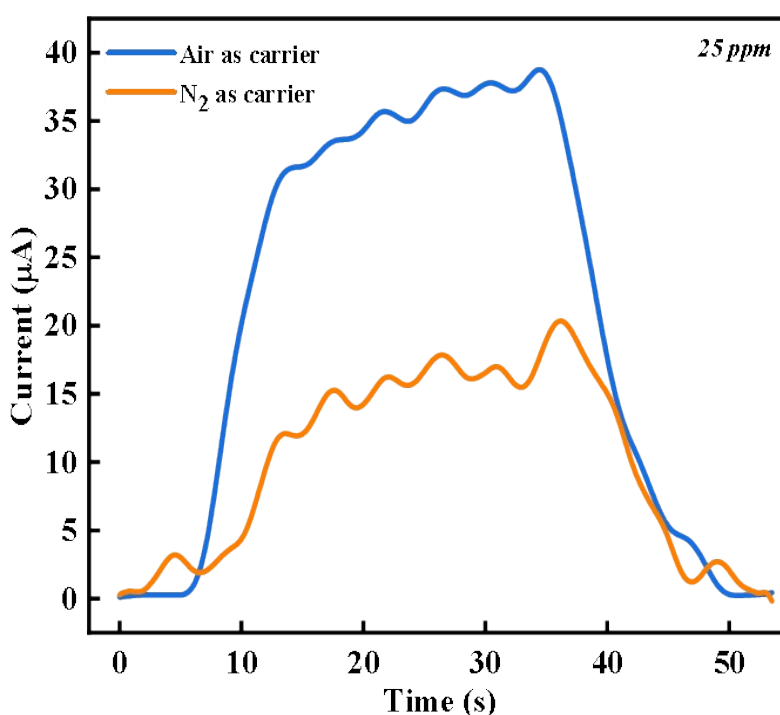

**Figure S7.** CO gas response at 25 ppm using different carrier gases.

## ESI 9. Earlier reports

**Table S2.** WS<sub>2</sub>-based CO gas sensing performance of organic component-based sensors: Previous reports versus our work.

| Sensing material                                                | Operating temperature (°C) | Detection range (ppm) | Response            |                    | Res/Rec Time (s) | Ref       |
|-----------------------------------------------------------------|----------------------------|-----------------------|---------------------|--------------------|------------------|-----------|
|                                                                 |                            |                       | Value               | Concentration used |                  |           |
| PPy-GO                                                          | RT                         | 50-300                | 45% <sup>a</sup>    | -                  | 89/95            | 6         |
| Au-decorated WS <sub>2</sub>                                    | 25                         | 0.1-50                | 1.48 <sup>b</sup>   | 50 ppm             | 175/25           | 7         |
| Au-decorated Sb-WS <sub>2</sub> composite                       | 20                         | -                     | 3.9 <sup>b</sup>    | 51 ppm             | 23/410           | 8         |
| Au-decorated 10 wt% SnO <sub>2</sub> -WS <sub>2</sub> composite | 20                         | -                     | 105 <sup>a</sup>    | 52 ppm             | 355/275          | 9         |
| PEDOT:PSS/Fe (Salem)                                            | RT                         | 10 - 100              | 1.5 <sup>b</sup>    | -                  | 38               | 10        |
| PEDOT:PSS/PPA                                                   | RT                         | 50 - 300              | 18.5 % <sup>a</sup> | 100                | 58/61            | 11        |
| SnO <sub>2</sub> /PPy/GO                                        | RT                         | 5 - 50                | 252 <sup>c</sup>    | 10                 | 85/65            | 12        |
| ZnO nanoroad                                                    | 50                         | -                     | 8 % <sup>a</sup>    | 15                 | 10/12            | 13        |
| PANI/Ti <sub>3</sub> AlC <sub>2</sub> /CeO <sub>2</sub>         | RT                         | 100 - 500             | 0.14 % <sup>a</sup> | 500                | -                | 14        |
| WS <sub>2</sub> NSs@PEDOT:PSS                                   | RT                         | 1 - 600               | 20.4 <sup>d</sup>   | 25                 | 5/8.5            | This work |

<sup>a</sup> ( $\Delta R/R_a$ ), <sup>b</sup>  $R_d/R_g$ , and <sup>c</sup> ( $\Delta I/I_a$ ).  $\Delta R$  is the difference in resistance values of the sensor between the target gas ( $R_g$ ) and air ( $R_a$ ).

## ESI. Reference

1. S. Sakamoto, M. Okumura, Z. Zhao and Y. Furukawa, *Chemical Physics Letters*, 2005, **412**, 395-398.
2. G. L. S. Garreau, J. P. Buisson, G. Froyer, and S. Lefrant, *Macromolecules*, **Vol. 32, No. 20, 1999**.
3. H. Long, L. Tao, C. Y. Tang, B. Zhou, Y. Zhao, L. Zeng, S. F. Yu, S. P. Lau, Y. Chai and Y. H. Tsang, *Nanoscale*, 2015, **7**, 17771-17777.
4. F. Song and X. Hu, *Nat Commun*, 2014, **5**, 4477.
5. M. Saliba, J. P. Atanas, T. M. Howayek and R. Habchi, *Nanoscale Adv*, 2023, **5**, 6787-6803.
6. M. A. Farea, H. Y. Mohammed, P. W. sayyad, N. N. Ingle, T. Al-Gahouari, M. M. Mahadik, G. A. Bodkhe, S. M. Shirsat and M. D. Shirsat, *Applied Physics A*, 2021, **127**.
7. J.-H. Kim, A. Mirzaei, H. W. Kim and S. S. Kim, *Sensors and Actuators B: Chemical*, 2019, **296**.
8. J. H. Kim, I. Sakaguchi, S. Hishita, T. Ohsawa, T. T. Suzuki and N. Saito, *Sensor Actuat B-Chem*, 2023, **382**.
9. J.-H. Kim, I. Sakaguchi, S. Hishita, T. T. Suzuki and N. Saito, *Chemosensors*, 2022, **10**.
10. F. Arabloo, S. Javadpour, R. Memarzadeh, F. Panahi, M. D. Emami and M. H. Shariat, *Synthetic Metals*, 2015, **209**, 192-199.

11. M. O. Farea, H. A. Alhadlaq, Z. M. Alaizeri, A. A. A. Ahmed, M. O. Sallam and M. Ahamed, *ACS Omega*, 2022, **7**, 22492-22499.
12. M. A. Farea, N. Yusof, H. Y. Mohammed, M. N. Murshed, M. E. El Sayed and D. Abdelhameed, *Materials Science in Semiconductor Processing*, 2025, **188**.
13. S. Dhall, K. Sood, J. Prakash and B. R. Mehta, *Physica Scripta*, 2024, **99**.
14. Z. Yang, X. Hu, M. Wu, J. Mao, N. Yang, X. Wang and Q. Zhang, *Journal of Molecular Structure*, 2025, **1322**.
